# Supplementary material for: Exploring Novel Therapeutic Opportunities for Glioblastoma Using Patient-Derived Cell Cultures
Source: MDPI journal article supplement (doi:10.3390/cancers15051562), 2023-03-02
Supplement: s1 [file s1]

|    | Cell line    | Histology (WHO grade)                          | Age | Sex    |
|----|--------------|------------------------------------------------|-----|--------|
| 1  | <b>WG 0</b>  | <i>Glioblastoma (WHO G4)</i>                   | 74  | Male   |
| 2  | <b>WG 1</b>  | <i>Glioblastoma (WHO G4)</i>                   | 68  | Male   |
| 3  | <b>WG 2</b>  | <i>Glioblastoma (WHO G4)</i>                   | -   | Male   |
| 4  | <b>WG 3</b>  | <i>Glioblastoma (WHO G4)</i>                   | 44  | Female |
| 5  | <b>WG 4</b>  | <i>Glioblastoma (WHO G4)</i>                   | 49  | Male   |
| 6  | <b>WG 5</b>  | <i>Glioblastoma (WHO G4) – regrowth</i>        | 25  | Female |
| 7  | <b>WG 6</b>  | <i>Glioblastoma (WHO G4)</i>                   | 66  | Female |
| 8  | <b>WG 7</b>  | <i>Pilocytic astrocytoma (WHO G1)</i>          | 15  | Female |
| 9  | <b>WG 8</b>  | <i>Pilocytic astrocytoma (WHO G1)</i>          | 14  | Female |
| 10 | <b>WG 9</b>  | <i>Glioblastoma (WHO G4)</i>                   | 56  | Female |
| 11 | <b>WG 10</b> | <i>Glioblastoma (WHO G4)</i>                   | 46  | Female |
| 12 | <b>WG 11</b> | <i>Oligodendroglioma anaplasticum (WHO G3)</i> | 41  | Female |
| 13 | <b>WG 12</b> | <i>Astrocytoma (WHO G2)</i>                    | 31  | Female |
| 14 | <b>WG 13</b> | <i>Glioblastoma (WHO G4)</i>                   | 62  | Male   |
| 15 | <b>WG 14</b> | <i>Glioblastoma (WHO G4)</i>                   | 70  | Male   |
| 16 | <b>WG 15</b> | <i>Glioblastoma (WHO G4)</i>                   | 79  | Male   |
| 17 | <b>WG 16</b> | <i>Glioblastoma (WHO G4)</i>                   | 34  | Female |
| 18 | <b>WG 17</b> | <i>Glioblastoma (WHO G4)</i>                   | 74  | Male   |
| 19 | <b>WG 18</b> | <i>Glioblastoma (WHO G4)</i>                   | 48  | Male   |
| 20 | <b>WG 19</b> | <i>Glioblastoma (WHO G4)</i>                   | 59  | Male   |

**Figure S1. Information about patient cohort and corresponding primary cell cultures**

Clinical data included histological type, age, gender of patients with corresponding primary glioma cell cultures.

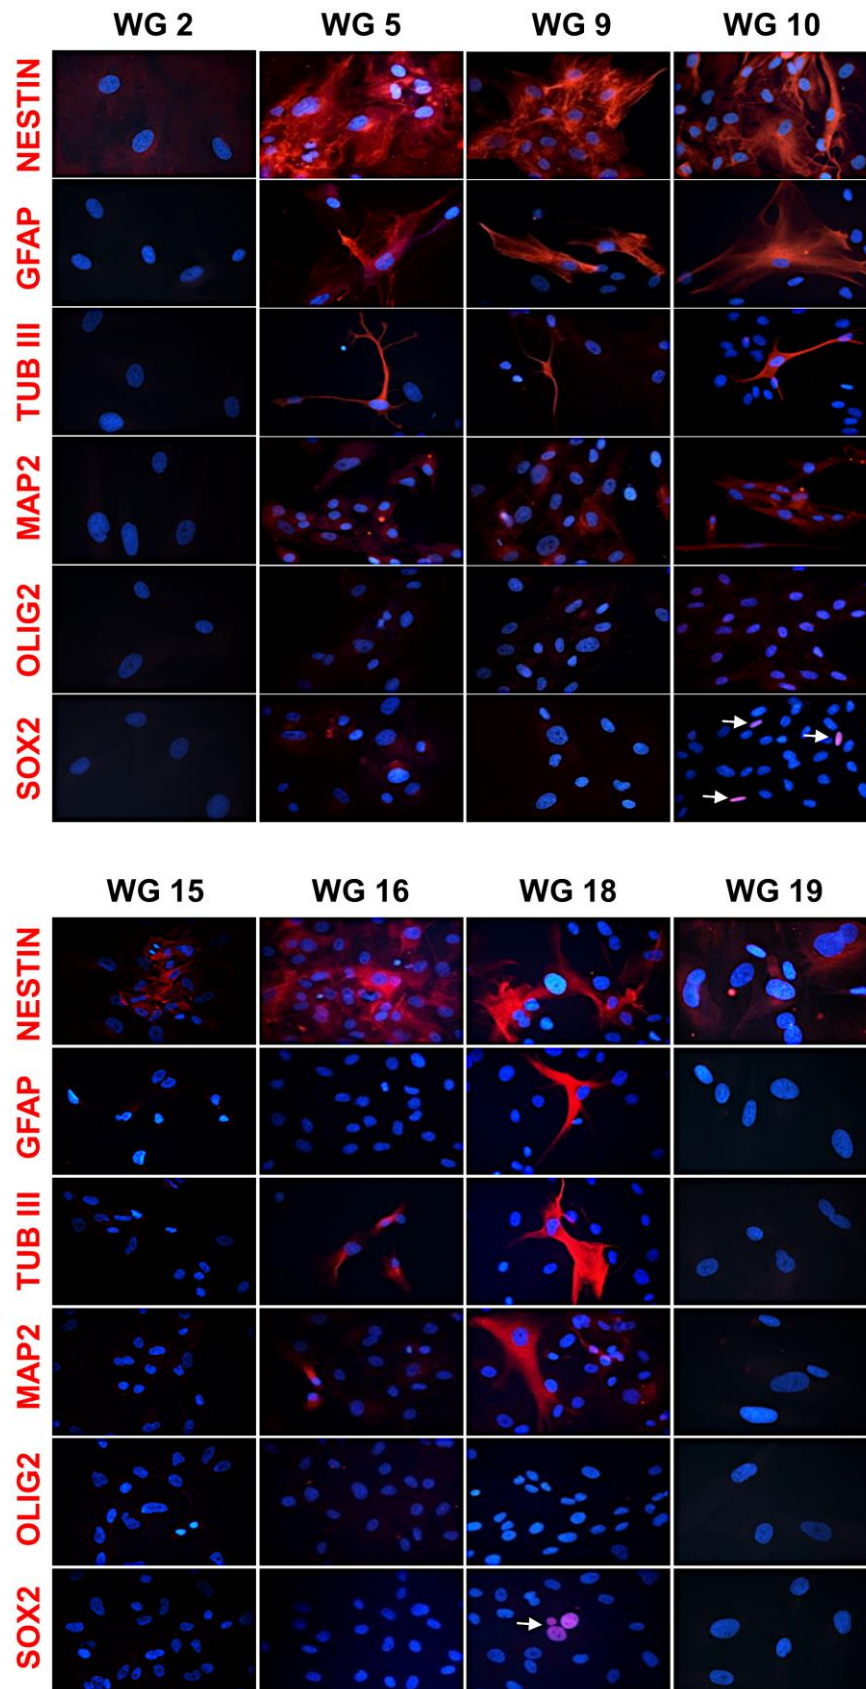

**Figure S2. Immunofluorescent staining of selected proteins in primary cell cultures**

Representative immunofluorescent staining of the stemness (NESTIN, SOX2, OLIG2) and differentiation (GFAP,  $\beta$ -TUB III, MAP2) markers in WG2, WG5, WG9, WG10, WG15, WG16, WG18 and WG19 cells. White arrows indicate SOX2 nuclear staining. Scale bar: 100  $\mu$ m.

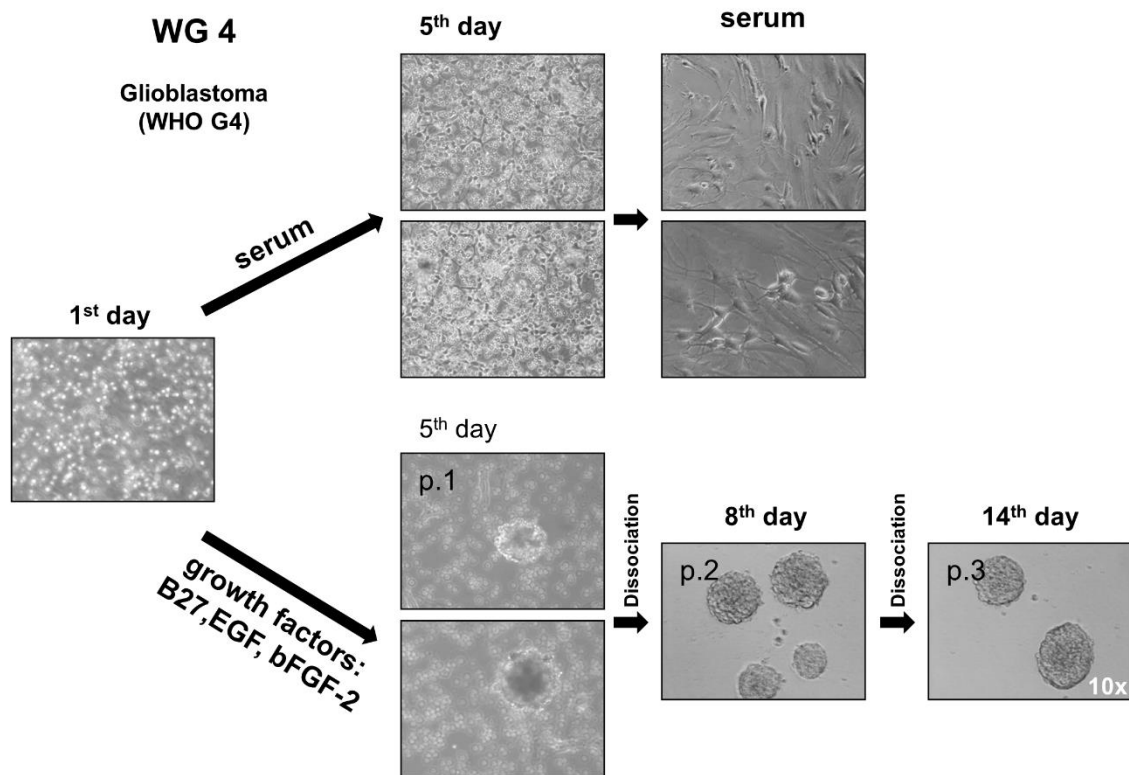

**Figure S3. Establishment of primary cell culture and passaging**

Light microscopy images of dissociated WG4 cells 1 day after tissue dissection, and after 5 days in the presence of serum (FBS) or under sphere conditions (growth factors). Morphology of adherent WG4 cells growing in the presence of serum, and second and tertiary generation of WG4 neurospheres growing in a medium supplemented with B27 and growth factors.

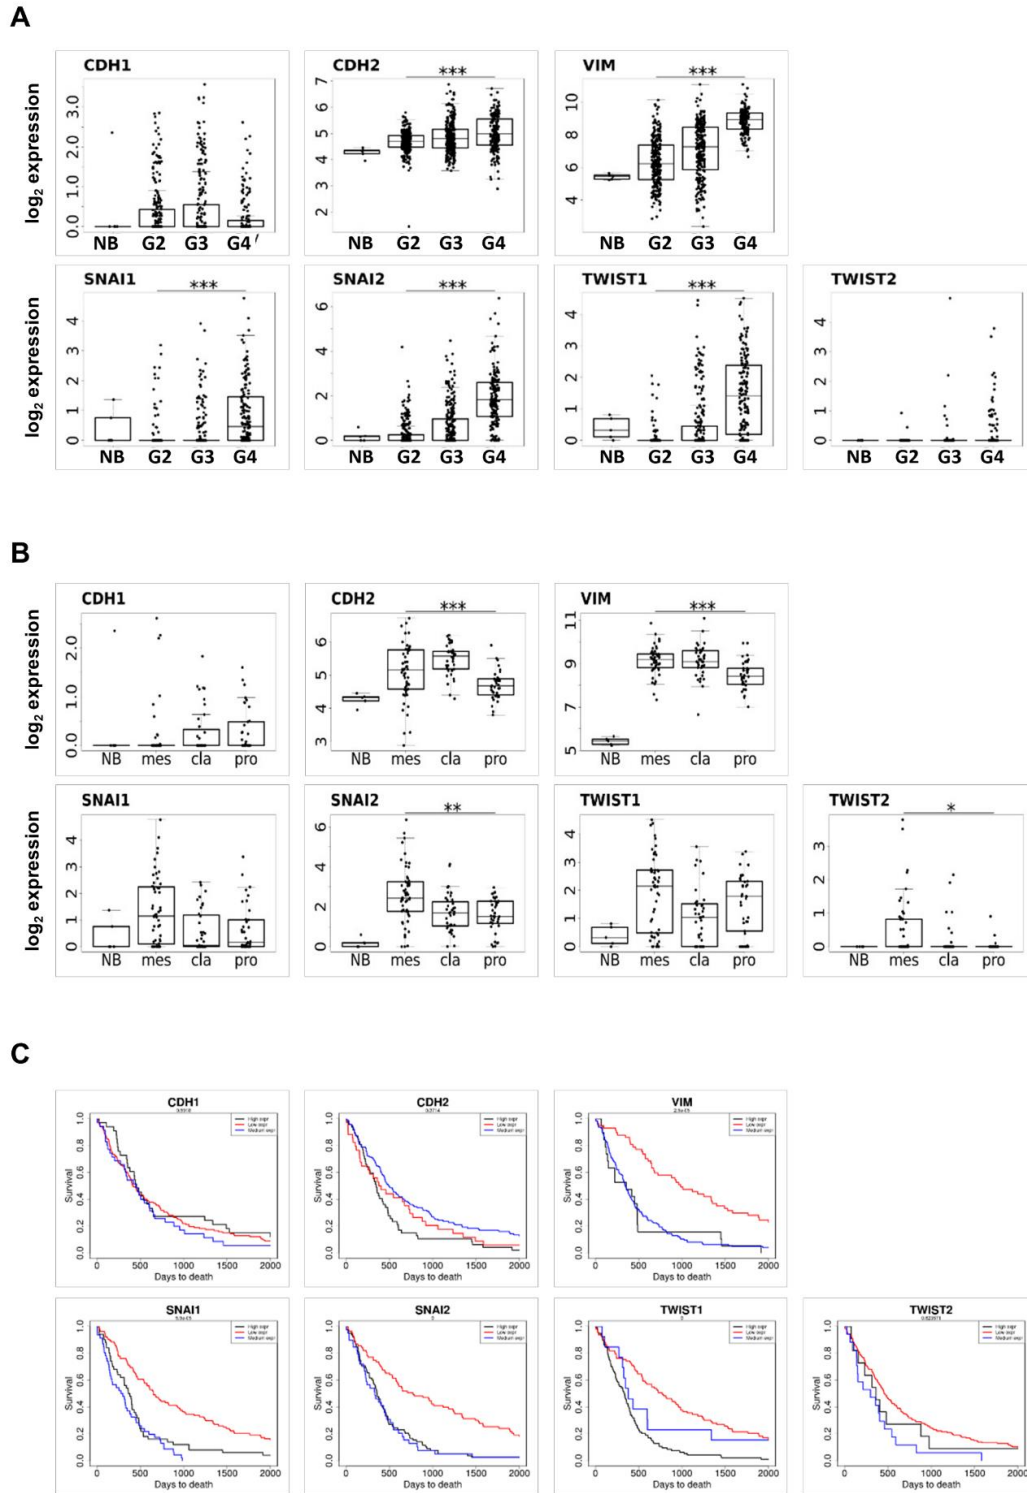

**Figure S4. Expression of EMT-related genes in TCGA gliomas and the survival analysis of GBM-patients with different expression of EMT-related genes**

(A) Expression of key EMT-related genes in glioma of different grades. Boxplots show the expression of *CDH1*, *CDH2*, *VIM*, *SNAIs*, *TWISTs* in normal brain samples (NB) compared to human gliomas of different grades (G2-G4) in the TCGA dataset. (B) Expression of key EMT genes in different subtypes of GBM. Boxplots show the expression of *CDH1*, *CDH2*, *VIM*, *SNAIs*, *TWISTs* in normal brain samples (NB) compared to different subtypes of GBM (mes-mesenchymal, cla-classical, pro-proneural). (C) Survival analysis of glioma patients with different expression of key EMT genes in the TCGA dataset. Association of *CDH1*, *CDH2*, *VIM*, *SNAIs* and *TWISTs* expression with overall survival in all grades gliomas in the TCGA dataset (red line - low expression, black line - high expression, blue line - medium expression).

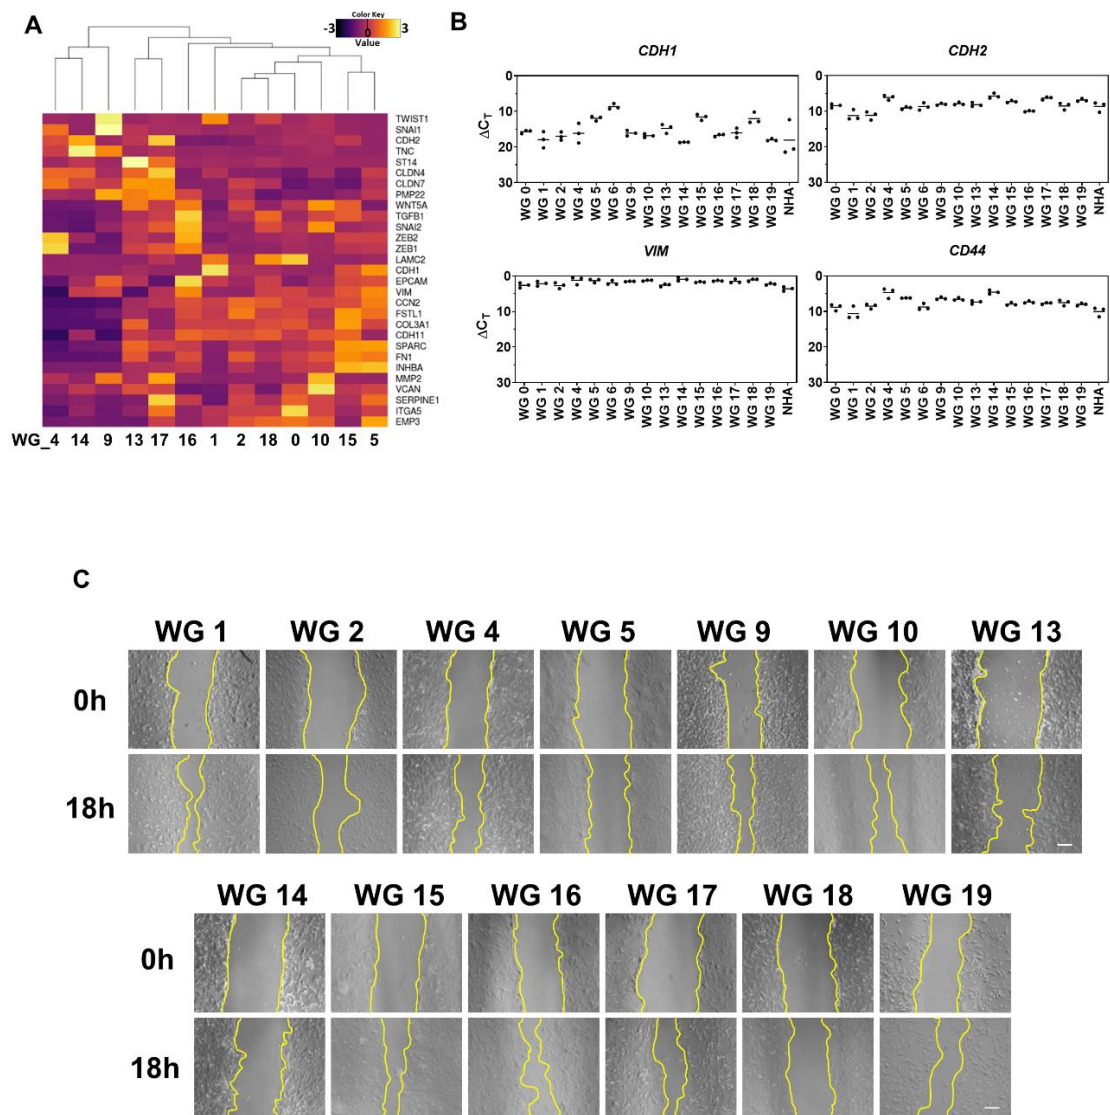

**Figure S5. Characterization of the mesenchymal phenotype of primary glioma cell cultures**  
**(A)** RNAseq of primary cell lines represented as a heatmap of EMT genes across primary glioma cell cultures.  
**(B)** Expression of chosen EMT-related genes (*CDH1*, *CDH2*, *VIM*, *CD44*). The RT-qPCR data are shown as delta Ct values relative to the 18S expression. Statistical analysis was performed using t-test (\* $p < 0.05$ , \*\* $p < 0.01$ , \*\*\* $p < 0.001$ ),  $n=3$ , mean  $\pm$  SD. **(C)** The migratory ability of different primary glioma cells was analyzed by scratch assay. Photos represent wound closure after 0 h and 18 h. Scale bar: 200  $\mu\text{m}$ .



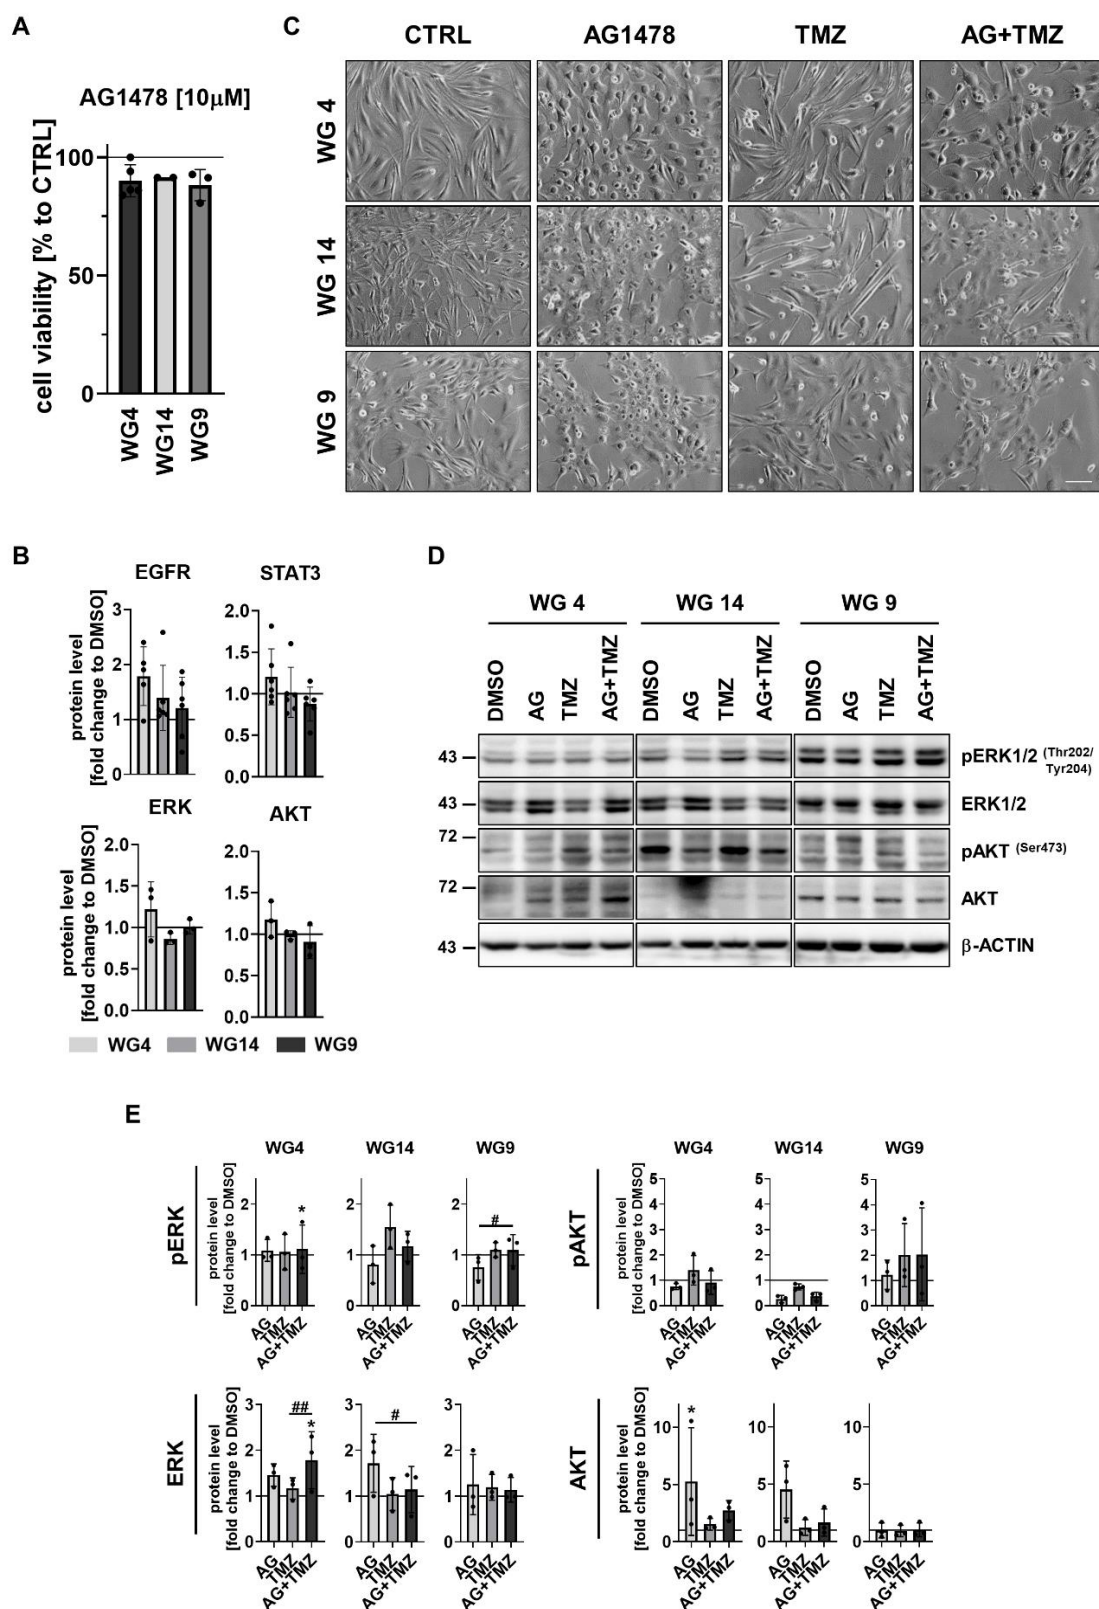

**Figure S6. The effect of AG1478 alone or in combination with TMZ**

(A) Cell viability of WG4, WG14 and WG9 cells after treatment with 10  $\mu$ M AG for 6 h, determined by PrestoBlue test. Viability of the control group was set as 100% and marked by a black solid line. Statistical significance was calculated on raw data by t-test in comparison to untreated cells (not significant). (B) The densitometric quantification of total: EGFR, STAT3, ERK and AKT in cells exposed to AG (10  $\mu$ M) for 6 h. The level of a protein of interest in control cells equals 1 and is marked by a solid black line.  $\beta$ -ACTIN was used as a loading control. Statistical significance was determined by t-test in comparison to control conditions (without AG), (not significant),  $n \geq 3$ , mean  $\pm$  SD. (C) Representative images of WG4, WG14 and WG9 cells after 10  $\mu$ M AG, 1 mM

TMZ and combined AG+TMZ treatment for 72 h. Scale bar: 100  $\mu$ m. **(D)** Representative immunoblots of proteins involved in EGFR signaling pathways in WG4, WG14 and WG9 cells treated with 10  $\mu$ M AG, 1 mM TMZ or with combination of AG+TMZ for 72 h with **(E)** the densitometric quantification. The level of a protein of interest in control cells equals 1 and is marked by a solid black line.  $\beta$ -ACTIN was used as a loading control. Statistical significance was determined by one-way ANOVA followed by Dunnett's post hoc test in comparison to untreated control cells (\* $p$ <0.05, \*\* $p$ <0.01, \*\*\* $p$ <0.001) or by one-way ANOVA followed by uncorrected Fisher's LSD test between the groups: AG or TMZ vs AG+TMZ (# $p$ <0.05, ## $p$ <0.01, ### $p$ <0.001),  $n$ =3, mean  $\pm$  SD.

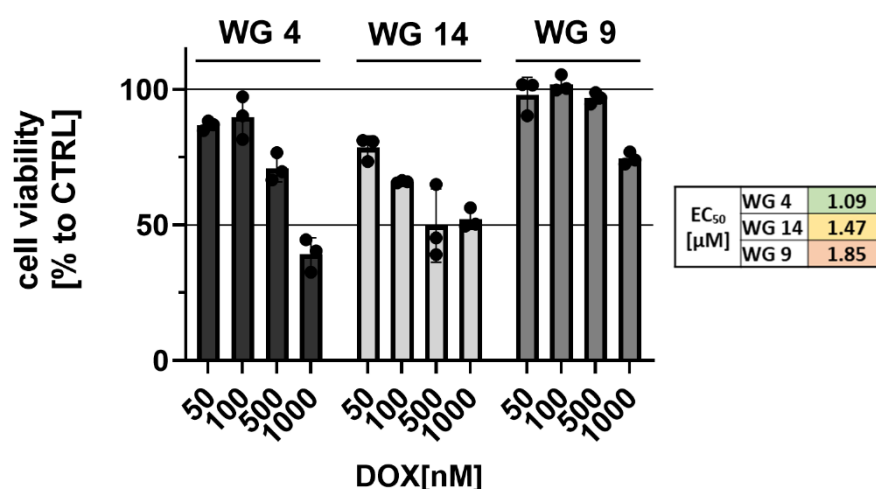

**Figure S7. Impact of DOX treatment to primary glioma cell cultures**

**(A)** Cell viability of WG4, WG14 and WG9 cells after DOX treatment for 48 h, determined by MTT cell metabolism test. The viability of untreated control cells was set as 100% and marked with a black solid line. EC<sub>50</sub> was calculated using a linear relationship between the dose and cell viability.  $n$ =3, mean  $\pm$  SD.

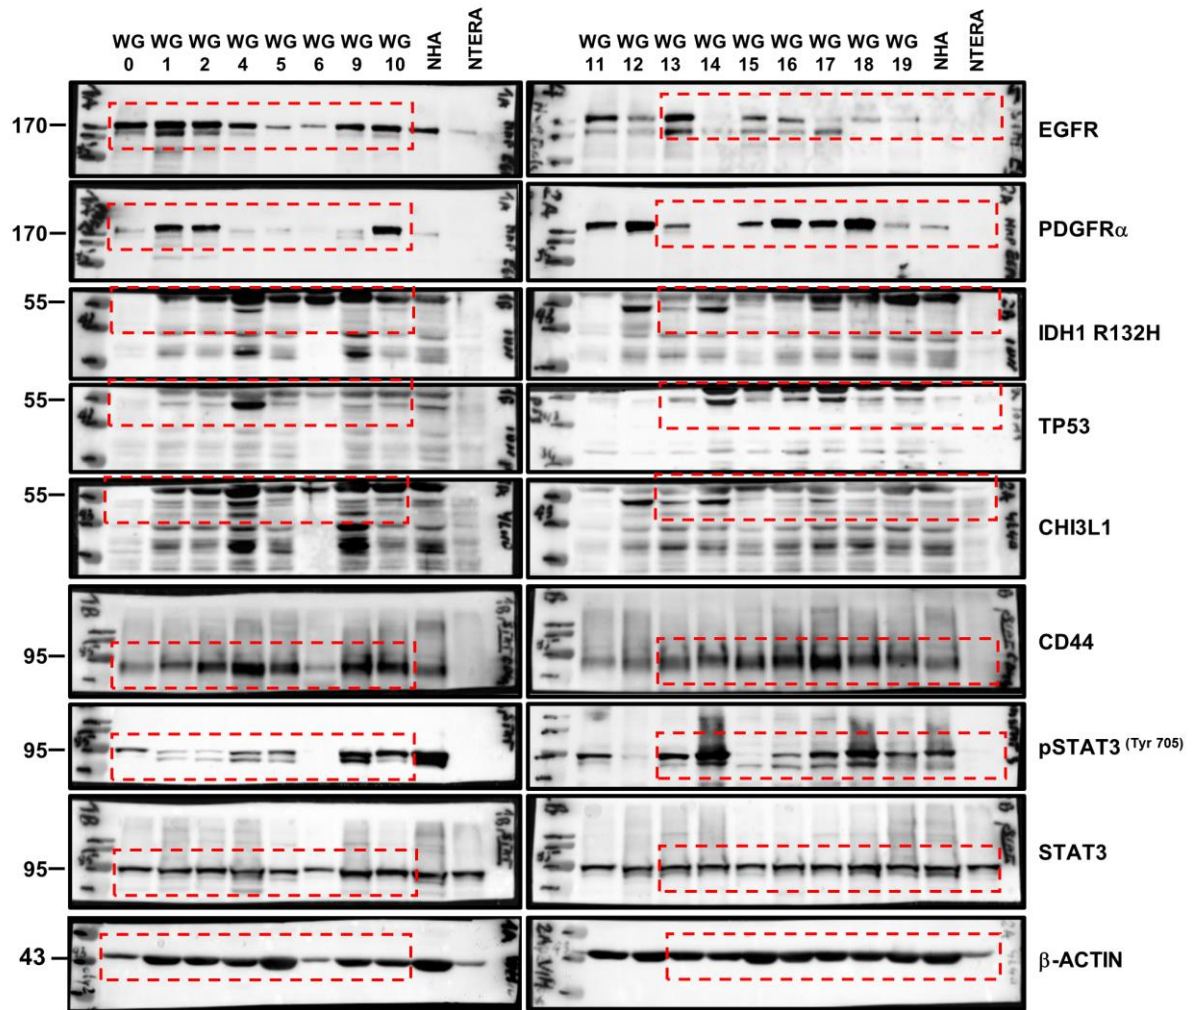

Figure S8. Western Blots related to Figure 1F.

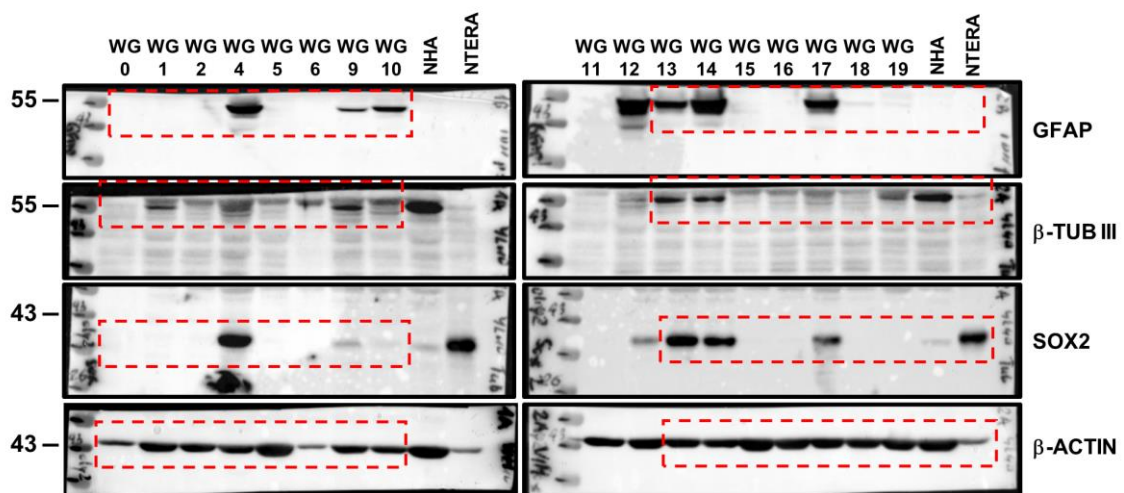

Figure S9. Western Blots related to Figure 2C.



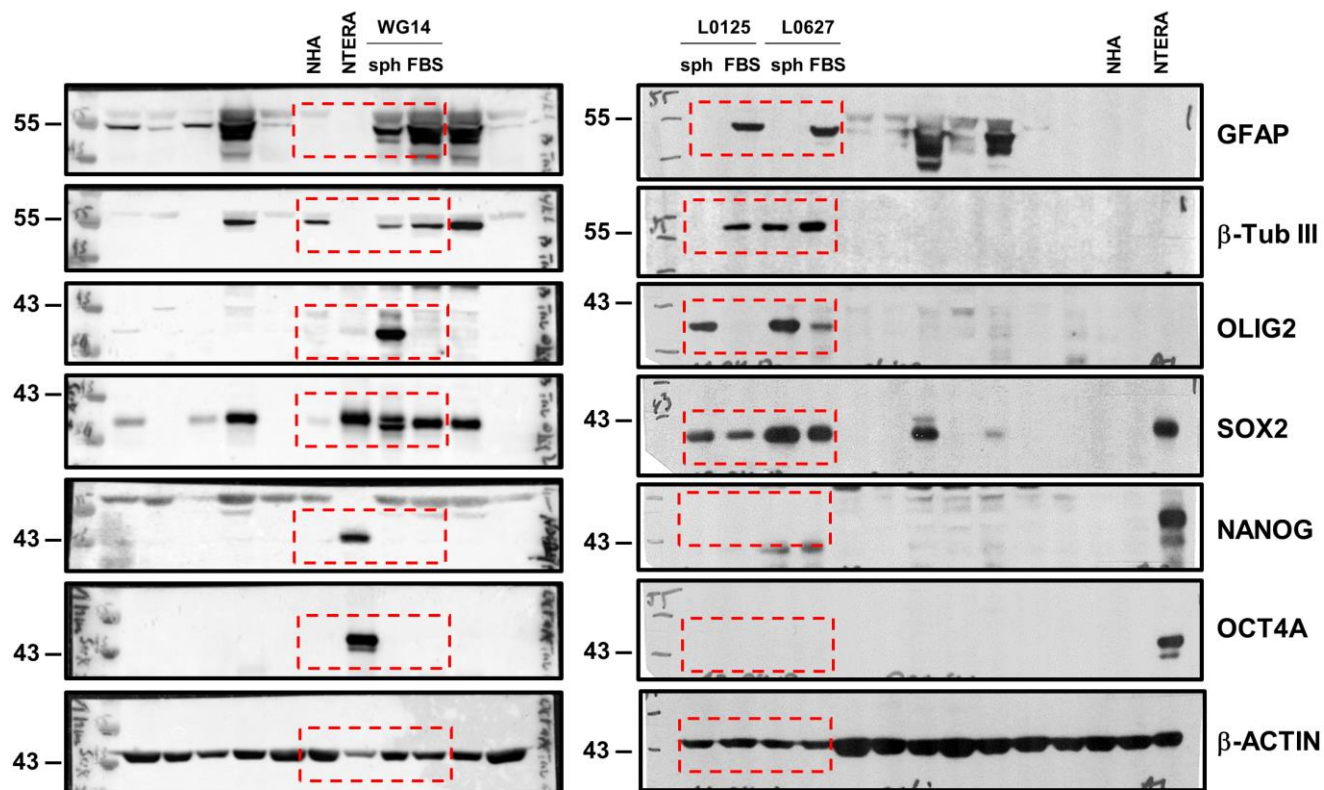

Figure S10. Western Blots related to Figure 3B.

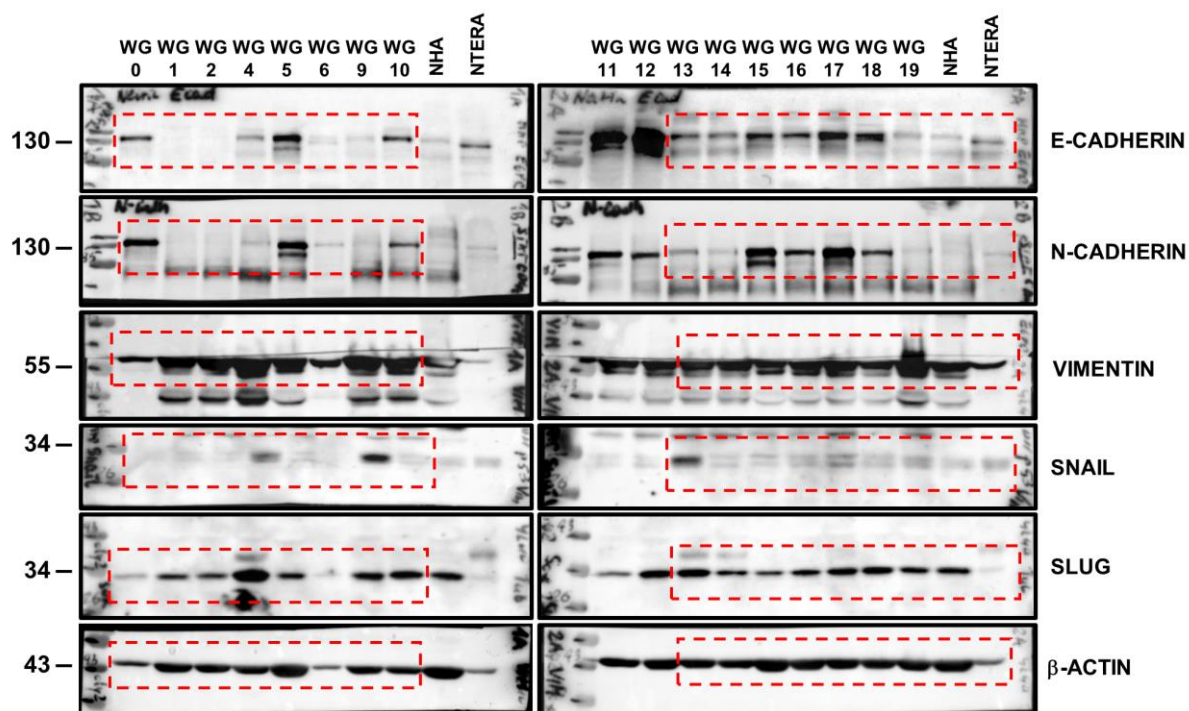

Figure S11. Western Blots related to Figure 4A.

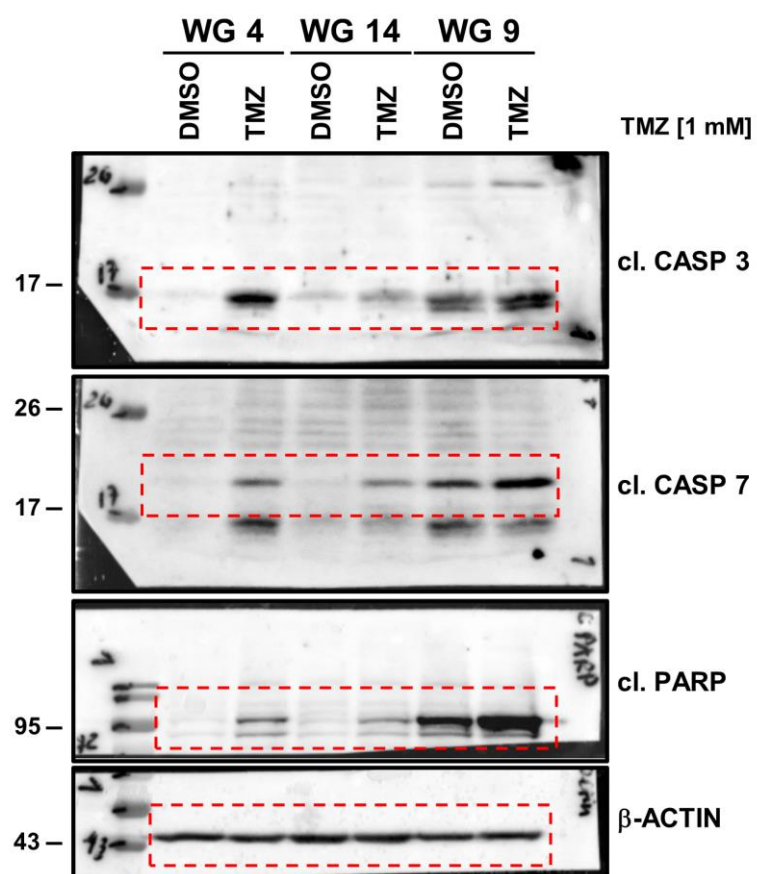

Figure S12. Western Blots related to Figure 5F.

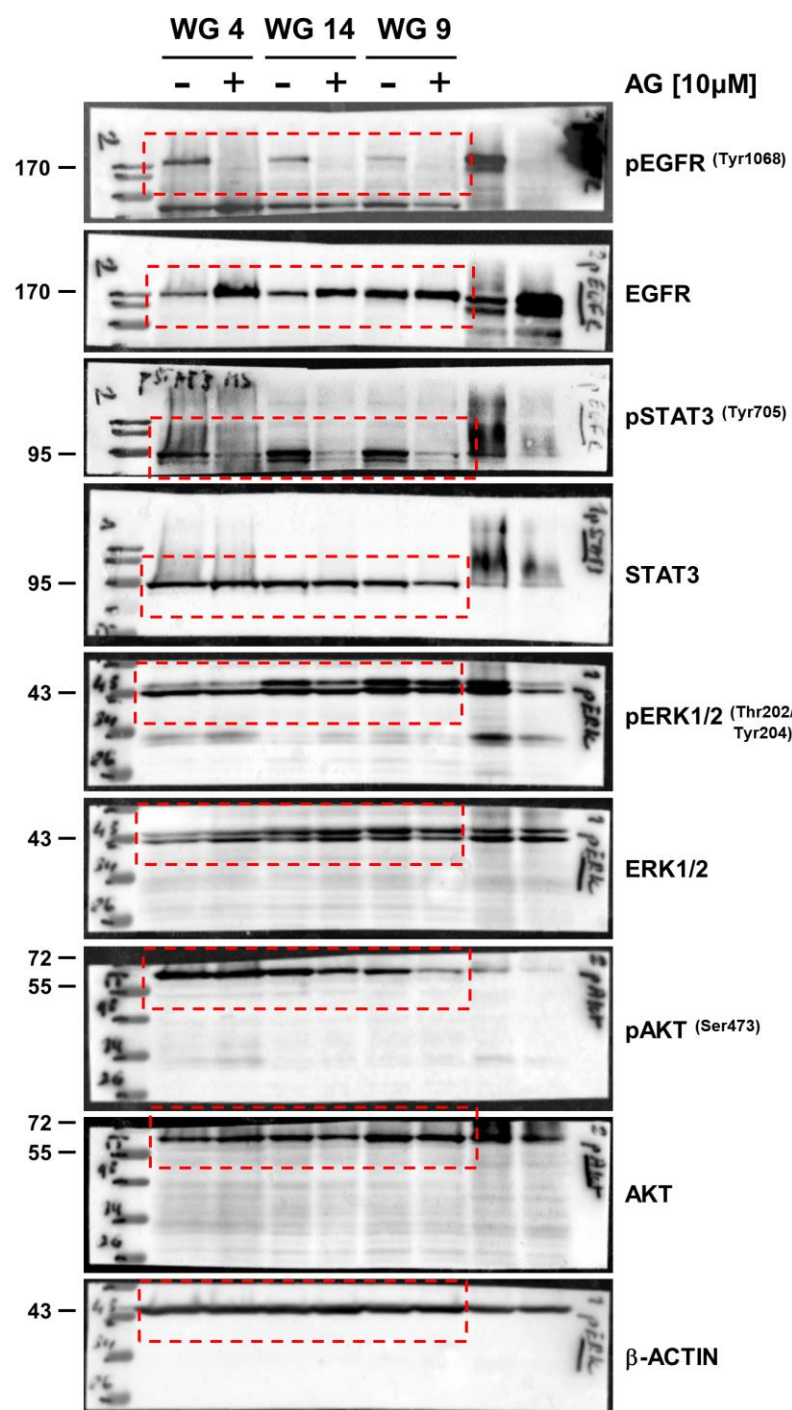

Figure S13. Western Blots related to Figure 6A.

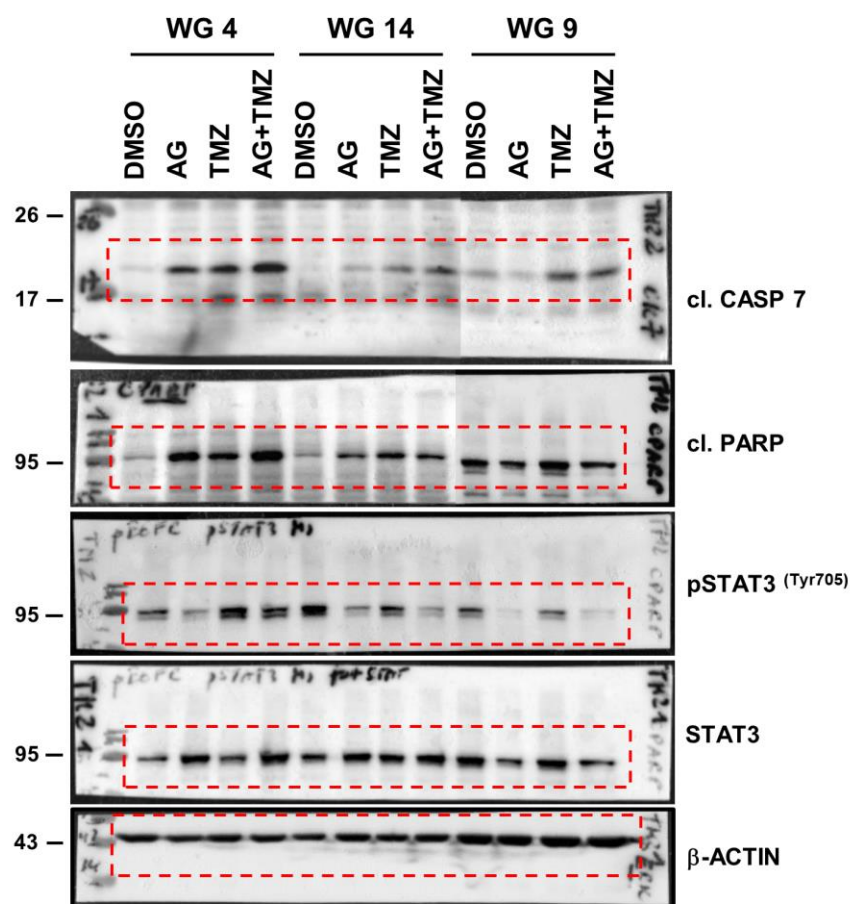

Figure S14. Western Blots related to Figure 6D.

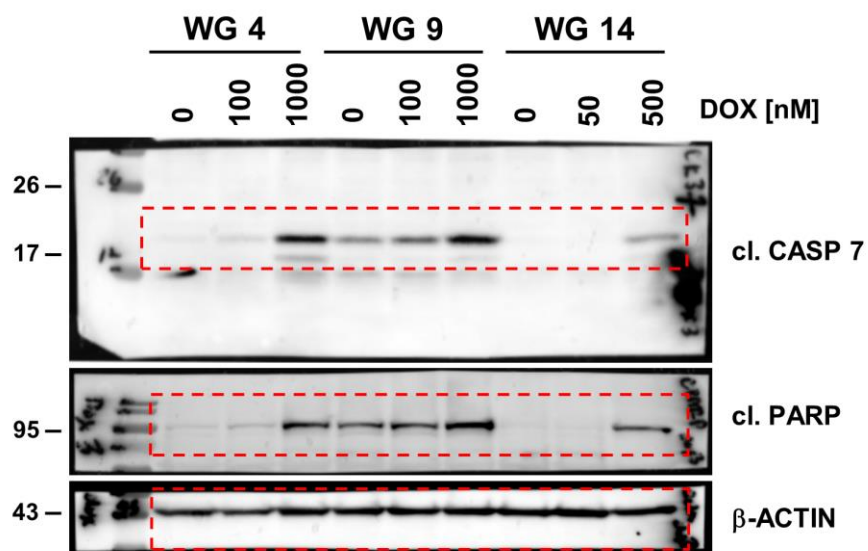

Figure S15. Western Blots related to Figure 7A.



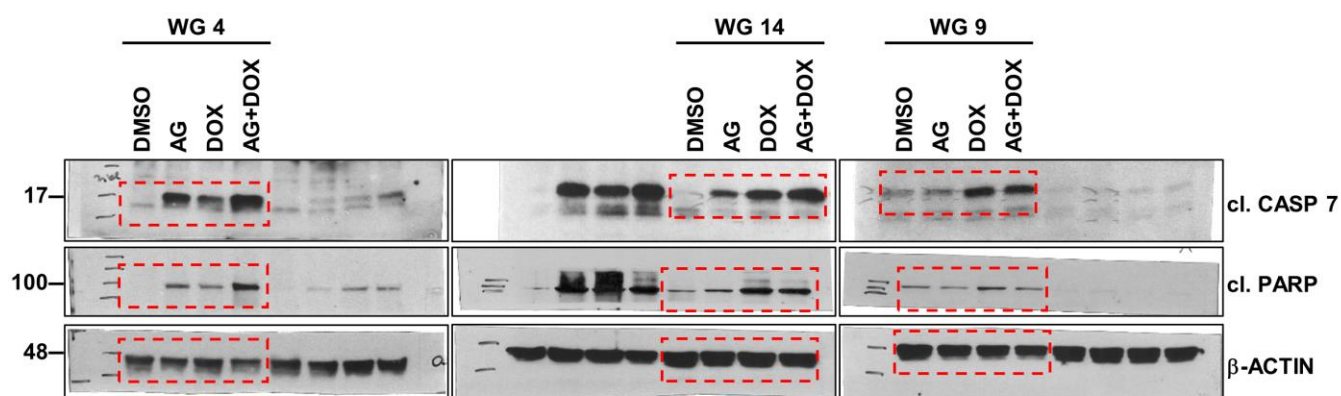

Figure S16. Western Blots related to Figure 7D.

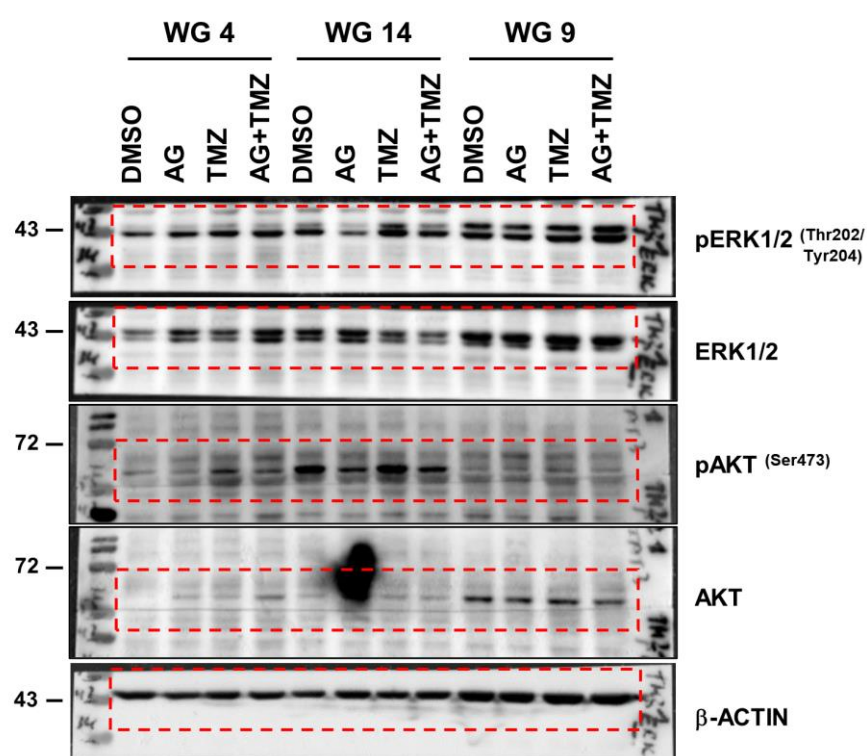

Figure S17. Western Blots related to Supplementary Figure S6D.



Table S1: Antibodies and reagents used.

| <b>Antibodies used for stainings</b>                              |                       |                      |                      |                 |
|-------------------------------------------------------------------|-----------------------|----------------------|----------------------|-----------------|
| <b>Antibody</b>                                                   | <b>Clone</b>          | <b>Manufacturer</b>  | <b>Cat. number</b>   | <b>Dilution</b> |
| anti-GFAP Cocktail                                                | 4A11, 1B4, 2E1        | BD Biosciences       | 555330               | 1:500           |
| anti-TUBULIN beta III isoform                                     | TU-20 (TUJ1)          | Millipore            | MAB1637              | 1:500           |
| anti-NESTIN                                                       | 196908                | R&D Systems          | MAB1259              | 1:100           |
| anti-MAP2                                                         | AP20                  | STEMCELL Technologie |                      | 1:200           |
| anti-OLIG2                                                        | 2583426               | Millipore            | AB9610               | 1:500           |
| anti-SOX2                                                         | D6D9                  | Cell Signaling       | 3579                 | 1:300           |
| Alexa Fluor 555 anti-rabbit                                       | -                     | Invitrogen           | A31572               | 1:1500          |
| Alexa Fluor 555 anti-mouse                                        | -                     | Invitrogen           | A31570               | 1:1500          |
| <b>Antibodies used for immunoblotting</b>                         |                       |                      |                      |                 |
| <b>Antibody</b>                                                   | <b>Clone</b>          | <b>Manufacturer</b>  | <b>Cat. number</b>   | <b>Dilution</b> |
| anti-AKT                                                          | -                     | Cell Signaling       | 9272                 | 1:1000          |
| anti-phospho-AKT (Ser473)                                         | 193H12                | Cell Signaling       | 4058                 | 1:1000          |
| anti-E-CADHERIN                                                   | 7H12                  | ThermoFisher         | MA5-15711            | 1:1000          |
| anti-N-CADHERIN                                                   | D4R1H                 | Cell Signaling       | 13116                | 1:1000          |
| anti-cleaved Caspase3                                             | -                     | Cell Signaling       | 9661                 | 1:1000          |
| anti-cleaved Caspase7                                             | -                     | Cell Signaling       | 9491                 | 1:1000          |
| anti-cleaved PARP                                                 | -                     | Cell Signaling       | 9541                 | 1:1000          |
| anti-EGFR                                                         | D38B1                 | Cell Signaling       | 4267                 | 1:1000          |
| anti-phospho-EGFR (Tyr1068)                                       | D7A5                  | Cell Signaling       | 3777                 | 1:1000          |
| anti-ERK1/2                                                       | -                     | Cell Signaling       | 9102                 | 1:1000          |
| anti-phospho-ERK1/2 (Thr202/Tyr204)                               | -                     | Cell Signaling       | 9101                 | 1:1000          |
| anti-NANOG                                                        | D73G4                 | Cell Signaling       | 4903                 | 1:1000          |
| anti-OCT4                                                         | C30A3                 | Cell Signaling       | 2840                 | 1:1000          |
| anti-SLUG                                                         | C19G7                 | Cell Signaling       | 9585                 | 1:1000          |
| anti-SNAIL                                                        | C15D3                 | Cell Signaling       | 3879                 | 1:1000          |
| anti-SOX2                                                         | D6D9                  | Cell Signaling       | 3579                 | 1:1000          |
| anti-STAT3                                                        | 124H6                 | Cell Signaling       | 9139                 | 1:1000          |
| anti-phospho-STAT3(Tyr705)                                        | M9C6                  | Cell Signaling       | 4113                 | 1:1000          |
| anti-VIMENTIN                                                     | D21H3                 | Cell Signaling       | 5741                 | 1:1000          |
| anti-OLIG2                                                        | 2583426               | Millipore            | AB9610               | 1:4000          |
| anti-TUBULIN beta III isoform                                     | TU-20 (TUJ1)          | Millipore            | MAB1637              | 1:500           |
| anti-GFAP Cocktail                                                | 4A11, 1B4, 2E1        | BD Pharmingen        | 555330               | 1:800           |
| anti-TP53                                                         | -                     | BD Pharmingen        | 610183               | 1:500           |
| anti-CD44                                                         | -                     | R&D Systems          | AF3660               | 1:1000          |
| anti-CHI3L1                                                       | -                     | R&D Systems          | AF2599               | 1:1000          |
| anti-IDH1 R132H                                                   | H09                   | Dianova              | DIA-H09              | 1:400           |
| anti-PDGFR $\alpha$ /CD140a                                       | -                     | ThermoFisher         | PA5-17623            | 1:1000          |
| horseradish peroxidase-conjugated monoclonal anti- $\beta$ -actin | AC-15                 | Sigma Aldrich        | A3854                | 1:30000         |
| horseradish peroxidase-conjugated anti-rabbit IgG                 | -                     | Vector               | PI-1000              | 1:5000          |
| horseradish peroxidase-conjugated anti-mouse IgG                  | -                     | Vector               | PI-2000              | 1:5000          |
| <b>Primers and reagents</b>                                       |                       |                      |                      |                 |
| <b>Primer</b>                                                     | <b>Forward</b>        |                      | <b>Reverse</b>       |                 |
| GFAP                                                              | TCCTGGAACAGCAAAACAAG  |                      | CAGCCTCAGGTTGGTTTCAT |                 |
| TUBB3                                                             | GTACGTGCCTCGAGCCATTCT |                      | CGTGAGTGACCCTTGGCCC  |                 |
| SOX2                                                              | GGGGAAAGTAGTTTGCTGCC  |                      | CGCCGCCGATGATTGTTATT |                 |

|                             |                                   |                                  |
|-----------------------------|-----------------------------------|----------------------------------|
| OLIG2                       | TCGCATCCAGATTTTCGGGT              | AAAAGGTCATCGGGCTCTGG             |
| NESTIN                      | CAAGACTTCCCTCAGCTTTCAG            | AGGTGTCTCAAGGGTAGCAG             |
| CDH1                        | CCCGCCTTATGATTCTCTGCTCGTG         | TCCGTACATGTCAGCCAGCTTCTTG        |
| CDH2                        | ATTTCCATCCTGCGCGTGAA              | ATCAGCACAAGGATAAGCAGGA           |
| VIM                         | GGCGAGGAGAGCAGGTTTC               | TGGGTATCAACCAGAGGGAGT            |
| CD44                        | CCATCTGTGCAGCAAACAACA             | TTCAGGTGGAGCTGAAGCATT            |
| 18S                         | CGGACATCTAAGGGGCATCAC             | AACGAACGAGACTCTGGCAT             |
| Methylated<br>MGMT          | TTTCGACGTTTCGTAGGTTTTTCGC         | GCACTCTTCCGAAAACGAAACG           |
| Unmethylated<br>MGMT        | TTTGTGTTTTGATGTTTGTAGGTTTTTG<br>T | AACTCCACACTCTTCCAAAAACA<br>AAACA |
| Spp1                        | QT01008798, Qiagen                |                                  |
| Other reagents              |                                   |                                  |
| Chemical compounds          |                                   | Source                           |
| Temozolomide                |                                   | Sigma-Aldrich                    |
| Doxorubicin hydrochloride   |                                   | Sigma-Aldrich                    |
| AG1478                      |                                   | Calbiochem                       |
| Software                    |                                   |                                  |
| GraphPad Prism 6.07         |                                   |                                  |
| BioRad Image Lab (ver. 5.2) |                                   |                                  |
